# Supplementary material
Source: publisher figshare collection journal article supplement (https://springernature.figshare.com/ndownloader/files/31178278)
Supplement: Supplementary file 1 [file 31178278]

Measurement(s),thalamic nuclei
Technology Type(s),multi-atlas segmentation
Sample Characteristic - Organism,Homo sapiens
